# Supplementary material for: MHC-matched allogeneic bone marrow transplants fail to eliminate SHIV-infected cells from ART-suppressed Mauritian cynomolgus macaques
Source: bioRxiv or medRxiv preprint supplement (doi:10.1101/2021.04.16.440168), 2022-02-25
Supplement: Supplementary file [file media-2.pdf]

**Supplementary Table 2: Single Nucleotide Polymorphisms (SNPs)**

| Gene     | Chromosome | Position  | Allele Change | Allele Specific Primers       | Locus Specific Primer      |
|----------|------------|-----------|---------------|-------------------------------|----------------------------|
| CELSR2 * | 1          | 112321563 | C → T         | CCCTGCAGTGAATTACGA[C/T]       | GCGCTTCCTGCCCTCATC         |
| GIPR     | 19         | 52125587  | C → T         | ATGGTCATGAGGATGGG[G/A]        | GCGAGCGCAACGAAGTCAA        |
| GPR107   | 15         | 8694018   | C → G         | CCTCAGGGTCGGCT[C/G]           | GCTCCTTGTTCAAGTGTGACAACAT  |
| GPR139   | 20         | 19030347  | A → G         | ATATCGCTGTCTGCCA[T/C]         | GCGTGCTGATGTAGTCTTCAGTC    |
| GPR149   | 2          | 133230027 | A → T         | CGCTTTGATCCTAGCACTTAC[A/T]    | GCCTTGTGAGCAACTGCACTTTTA   |
| GPR183 * | 17         | 79668813  | G → A         | GCCTCTGCATTACAGCCT[C/T]       | GCATGACAACCAAGGCTAGTAAGTTT |
| GPR68    | 7          | 154450353 | G → T         | TGATGTAGATGTTCTCGTAGAG[G/T]   | GCGCGTGTACCTGTGCAA         |
| GPR98    | 6          | 86863653  | C → T         | TATGGAAAACCAGAAGATTGAAAG[C/T] | GCCTCACATCTCCTTTAGTCCCT    |
| HTR5A *  | 3          | 192188304 | A → G         | GGTCAACTATTGGGACATAC[T/C]     | GCGGATAGGAGACCATAGTTCCA    |
| MC4R *   | 18         | 53659440  | G → A         | GATTGCTGTCTCCC[C/T]           | GCCCAATCAGGATGGTCAAAGTAAT  |
| P2RY11   | 19         | 9916169   | G → A         | AAGCTGCGTGTGGC[G/A]           | GCCCGAGCATCCACGTTGA        |
| TAAR1    | 4          | 131253869 | C → T         | ATCTCTTCAGCGCCTTTGAA[G/A]     | GCTGTCTTTCATCTCCATTGACCG   |

We genotyped each donor/recipient pair using the rhAMP SNP Assay (IDT) to identify diagnostic SNPs, with preference given to homozygous/homozygous mismatches. The SNPs marked with an asterisk (\*) were used in this study to determine donor chimerism post-transplant. The chromosome positions are relative to the rhesus macaque genome assembly rheMac2.
