# Supplementary material for: MHC-matched allogeneic bone marrow transplants fail to eliminate SHIV-infected cells from ART-suppressed Mauritian cynomolgus macaques
Source: bioRxiv or medRxiv preprint supplement (doi:10.1101/2021.04.16.440168), 2022-02-25
Supplement: Supplementary file [file media-3.pdf]

**Supplementary Table 3.**

| Illumina Sequencing Primers |                       |                        |                             |
|-----------------------------|-----------------------|------------------------|-----------------------------|
| <b>Gene</b>                 | <b>5' Primer</b>      | <b>3' Primer</b>       | <b>Amplicon Length (bp)</b> |
| CELSR2                      | GGAGCTGCTCCTGGGTGAC   | CAACACCTACCAAAGGAGCCTT | 150                         |
| GPR183                      | CACCTCCTCAGGGAAATGA   | GAACAATGACAACCAAGGC    | 132                         |
| HTR5A                       | GAGACCATAGTTCCAGGCT   | TCCCTGCTTTCATGGATAGGA  | 165                         |
| MC4R                        | TTGGCTCTCATGGCTTCTCTC | CAGCAGACAACAAAGACGCC   | 161                         |
